# Supplementary material
Source: publisher figshare collection journal article supplement (https://tandf.figshare.com/ndownloader/files/25778813)
Supplement: Supplementary file 1 [file 25778813]

**Supporting Information for the article “Pious Pioneers: The expansion of Mennonite colonies in Latin America”**

Yann le Polain de Waroux1,2,*, Janice Neumann1, Anna O’Driscoll1 & Kerstin Schreiber1.

1. Department of Geography, McGill University
2. Institute for the Study of International Development, McGill University

*) Corresponding Author: Department of Geography, McGill University, Burnside Hall, rm. 311, 805 Sherbrooke St. West, Montreal, QC, H3A 0B9

The complete data for this paper (vector files of the complete map, table, and family tree of all colonies) is available under the following link: <https://doi.org/10.5683/SP2/I4FEQZ>

**SI1: Family tree of Latin American Mennonite colonies**

**Caption**: Simplified family tree of Latin American Mennonite colonies. Each grey column represents the duration of existence of a colony, and each line represents a foundational link between a “mother” colony (dark end) and a “daughter” colony (light end). A higher-resolution version of this image as well as a complete searchable family tree with colony names and greater detail are available for download under the following link: <https://doi.org/10.5683/SP2/I4FEQZ>

**SI2: Expansion of Mennonite colonies in Paraguay**

**Caption:** Mennonite colonies in Paraguay (Projection: World Robinson). The complete dataset of Latin American Mennonite colonies is available under the following link: <https://doi.org/10.5683/SP2/I4FEQZ>

**SI3: Expansion of Mennonite colonies in Bolivia**

**Caption:** Mennonite colonies in Bolivia (Projection: World Robinson). The complete dataset of Latin American Mennonite colonies is available under the following link: <https://doi.org/10.5683/SP2/I4FEQZ>

**SI4: Location choices of Mennonite colonies**


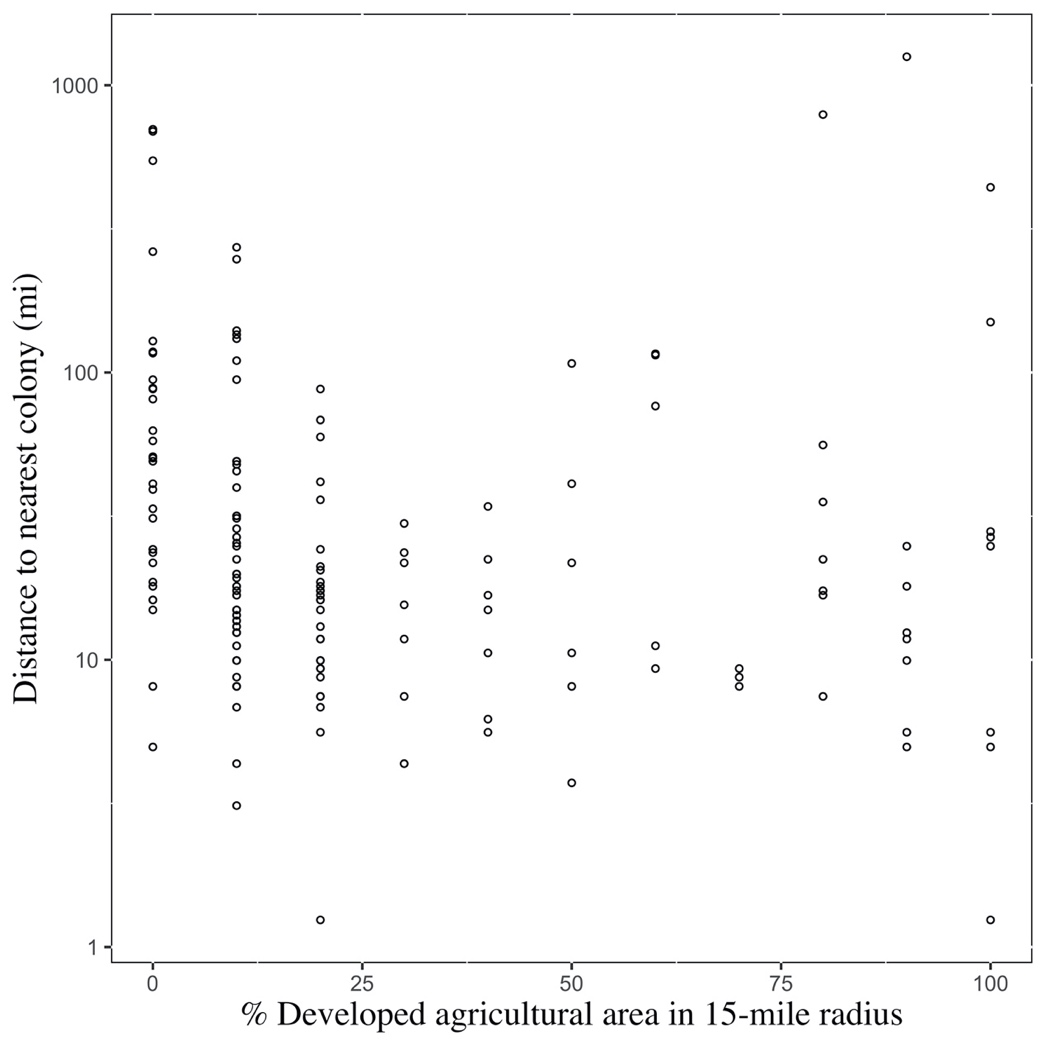


**Caption**: Location choices of Mennonite colonies with respect to agricultural areas and other colonies since 1985. To create this plot, we first used the centroids of the colony polygons, created yearly layers of existing colonies and reported the distance of each new colony to the nearest one in the corresponding year. Second, we used the history function in Google Earth Pro to visually identify the approximate percentage of the land within a 25-km buffer covered by agriculture (rounded to the next ten), interpreted as clearings (in forests) and/or patterns and color differences clearly indicative of pastures or fields. We differentiated between agricultural land within and outside Mennonite colonies. Because of limits in the availability of images this variable was only calculated for 1985 to 2016. The clustering of colonies on the left shows a tendency to create colonies in areas with very little agricultural development.

**SI5: A closer look at Bolivia**

Information compiled by envoys of the Mennonite Central Committee, a global non-profit organization, offers some insights into the causes behind the creation of new colonies in Bolivia. In a book published in 2009, Sieghard and Sylvia Schartner (2009) relied on accounts of colony leaders to write portraits of all existing Bolivian colonies at the time, including the reason for their creation. This information was later updated by Isbrand and Martha Hiebert, also MCC envoys, for recent colonies. The causes mentioned in these accounts align with those expected from the literature: on the one hand are cultural or religious factors, such as disagreements over aspects of modernization like the adoption of rubber tires, connection to the national electricity grid, or changes to education. On the other hand, are land scarcity – by far the most common explanation – and other issues with production, such as a dissatisfaction with local agronomic conditions. Interestingly, the causes invoked vary both over time and between colonies involving international vs. internal migrations: eighty-five percent of colonies initiated by international migrants were reportedly created at least partly for cultural or religious reasons, whereas only 13 percent of those created by Bolivian Mennonites were. Conversely, land scarcity weighed more for daughter colonies of Bolivian colonies (83 percent) than for colonies created by international migrants (38 percent). Because internal expansion increased in importance over the years, this also means that the balance between cultural-religious reasons and land scarcity has steadily shifted in favor of the latter.

**Reference:**Schartner, Sieghard, and Sylvia Schartner. *Bolivien: Zufluchtsort Der Konservativen Mennoniten*. Santa Cruz, Bolivia: Editorial Litocolor S.A., 2009.
